# Supplementary material for: 2D analogues of the inverted hexagonal phase self-assembled from 4,6-dialkoxylated isophthalic acids at solid–liquid interfaces
Source: Royal Society of Chemistry journal article supplement (doi:10.1039/c0nr00176g), 2010-01-01
Supplement: c0nr00176g.pdf [file c0nr00176g.pdf]

## SUPPORTING INFORMATION

### **2D analogues of the inverted hexagonal phase self-assembled from 4,6-dialkoxylated isophthalic acids at solid-liquid interfaces**

Andrey S. Klymchenko<sup>a,b,\*</sup>, Shuhei Furukawa<sup>a,§</sup>, Tanya Balandina<sup>a</sup>, Klaus Müllen<sup>c</sup>, Mark Van der Auweraer<sup>a</sup>, Steven De Feyter<sup>a,\*</sup>

#### **1. Self-assembly on Au(111) under potential control**

**Video S1.** Ordering of ISA-D10 at Au(111)-water (0.1 M HClO<sub>4</sub>) interface as a function of time. A sequence of 18 frames, recorded approx. every 1 min, are presented. While the ordering of cyclic structures remains intact, the bright spots in the middle of these cycles show dynamics. Substrate potential,  $E_w = 350$  mV vs SCE; tunneling current,  $I_t = 1$  nA; bias voltage,  $U_{\text{bias}} = -300$  mV.

**Video S2.** Ordering of ISA-D7 at Au(111)-water (0.1 M HClO<sub>4</sub>) interface as a function of time. A sequence of 15 frames, recorded approx. every 1 min, are presented. Similarly to ISA-D10, the ordering of cyclic structures remains intact, while the bright spots in the middle of these cycles show dynamics.  $E_w = 350$  mV vs SCE;  $I_t = 1$  nA; bias voltage,  $U_{\text{bias}} = -300$  mV.

## 2. Self-assembly at the Au(111)-tetradecane interface

STM images were obtained by using a PicoSPM with a tip mechanically cut from a Pt/Ir wire (80/20, diameter 0.25 mm).

### 2.1 Self-assembly of ISA-D7 on Au(111).

Similar to the results obtained with EC-STM at the Au(111)-water (0.1 M HClO<sub>4</sub>) interface, ISA-D7 at the Au(111)-tetradecane interface shows both pentameric cyclic and zig-zag type patterns (Figure S1). The pentameric cyclic structure is the dominant one.

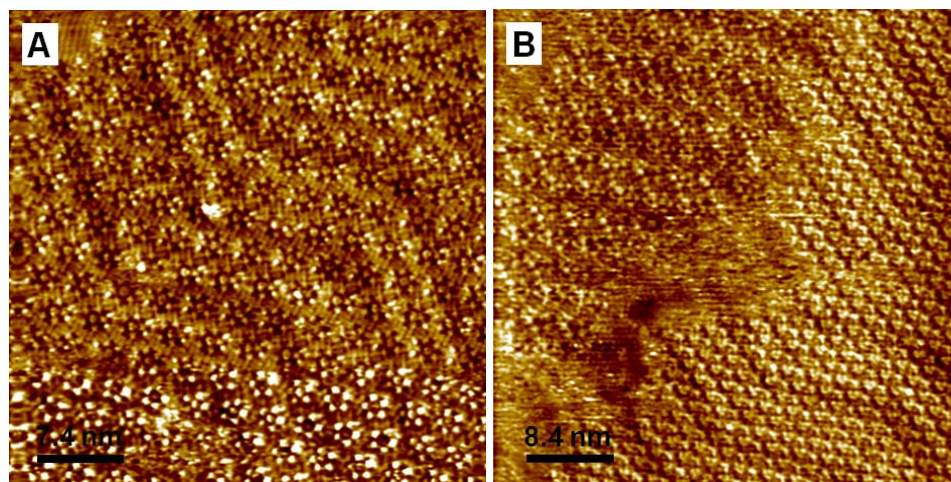

**Figure S1.** Representative STM images of ISA-D7 at the Au(111)-tetradecane interface: coexistence of two patterns. a)  $I = 100$  pA,  $V = -340$  mV; b)  $I = 100$  pA,  $V = -340$  mV.

### 2.2 Self-assembly of ISA-D10 on gold (111).

Similar to ISA-D10 measured with EC-STM at the Au (111)-water (0.1 M HClO<sub>4</sub>) interface, predominantly pentameric cyclic structures are formed and the degree of long-range ordering is limited. “Defect” clusters of more than five ISA-D10 molecules are common. A typical STM image of ISA-D10 at the Au(111)-tetradecane interface is shown in Figure S2.

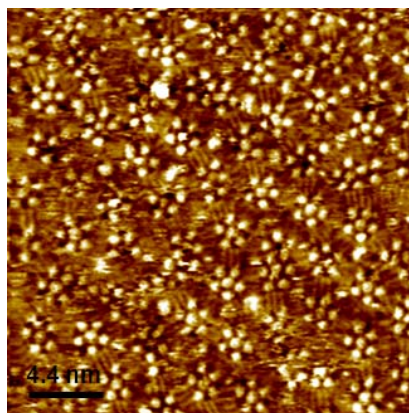

**Figure S2.** STM image of ISA-D10 at Au(111)-tetradecane interface:  $I = 271$  pA,  $V = -248$  mV.

### **2.3 Self-assembly of ISA-D15 on Au(111).**

Very similar to the experiments obtained with EC-STM at the Au (111)-water (0.1 M HClO<sub>4</sub>) interface, ISA-D15 forms more disordered patterns compared to ISA-D7 and ISA-D10 at the Au(111)-tetradecane interface as well. ISA-D15 shows a tendency to form tetramers, hexamers, and even octamers, involving the interdigitation of alkyl chains (Figure S3).

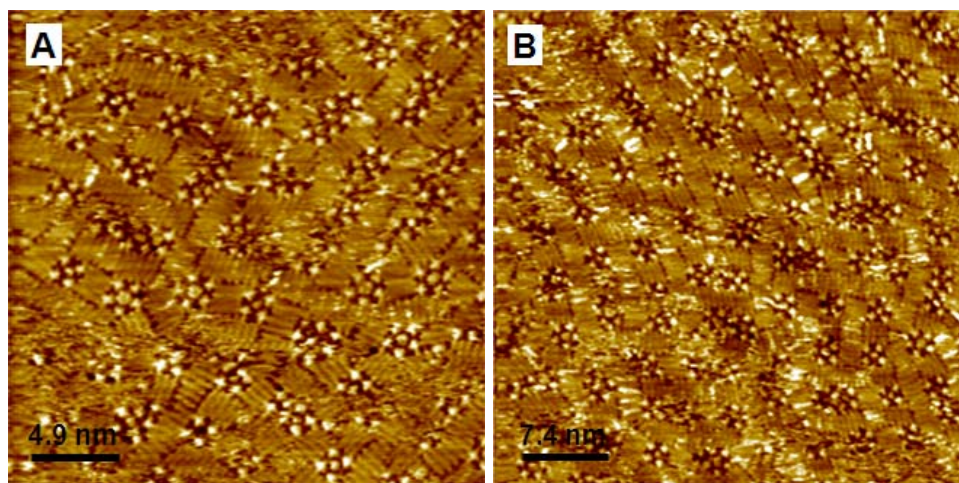

**Figure S3.** STM images of ISA-D15 at Au(111)-tetradecane interface. a)  $I = 225$  pA,  $V = -128$  mV; b)  $I = 237$  pA,  $V = -245$  mV.

### 3. Self-assembly at the HOPG-tetradecane interface

#### 3.1. Self-assembly of ISA-D10 on HOPG.

ISA-D10 at the HOPG-tetradecane interface forms a regular network of pentameric cyclic structures (Figure S4). The degree of order is higher than for ISA-D10 on Au(111).

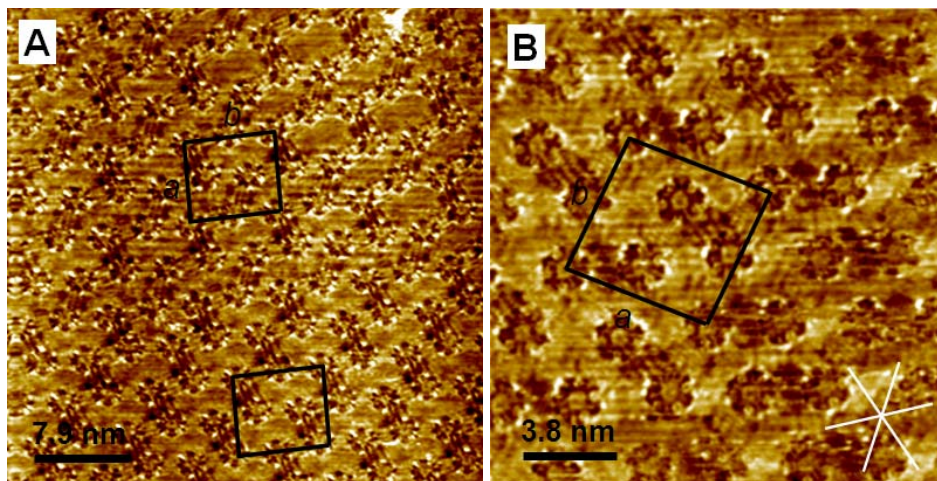

**Figure S4.** STM images obtained at HOPG/tetradecane interface for the monolayer of ISA-D10. a)  $I = 214$  pA,  $V = -800$  mV, b)  $I = 111$  pA,  $V = -883$  mV. Unit cells are indicated:  $a = 6.4 \pm 0.1$  nm,  $b = 6.8 \pm 0.1$  nm,  $\alpha = 89 \pm 1^\circ$ .

#### 3.2. Self-assembly of ISA-D15 on HOPG.

At the HOPG-tetradecane interface ISA-D15 forms two types of domains both coexisting on the surface (Figure S5). One type of pattern consists of cyclic pentamers (unit cell values are  $a = 6.8 \pm 0.4$  nm,  $b = 8.3 \pm 0.1$  nm,  $\alpha = 90 \pm 0.5^\circ$ ), a motif which is quite typical for this class of molecules. The second type resembles a linear network ( $a = 2.4 \pm 0.1$  nm,  $b = 3.3 \pm 0.1$  nm,  $\alpha = 90 \pm 1^\circ$ ). For the latter network, only 3 out of 4 alkyl chains are adsorbed.

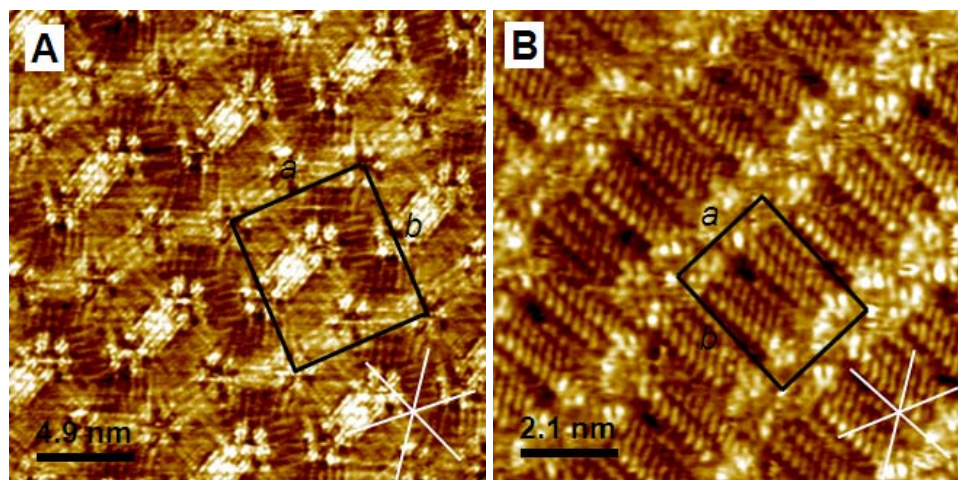

**Figure S5.** STM images of ISA-D15 at the HOPG-tetradecane interface,  $I = 135$  pA,  $V = -800$  mV. Two types of networks are observed: a) pentameric cyclic, where pentamers are well-ordered into parallel rows; b) high resolution image of the linear type pattern.

#### 4. Cyclic voltammetry on Au(111) substrate in $\text{HClO}_4$

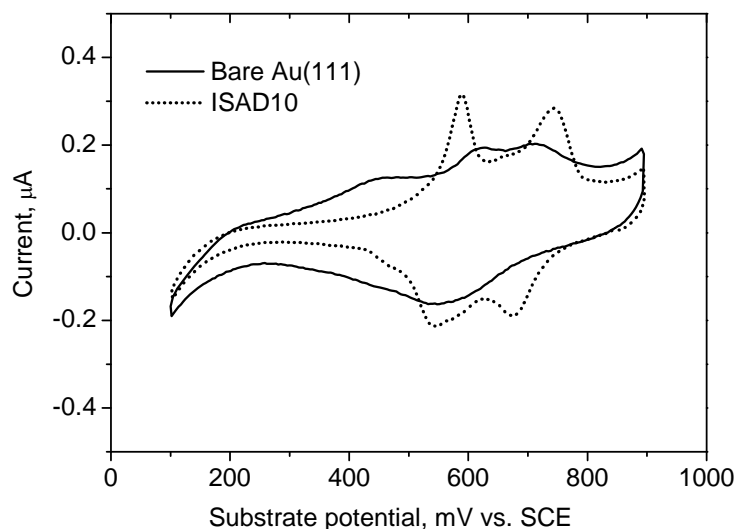

**Figure S6.** Cyclic voltammograms of bare Au(111) electrode in 0.1 M  $\text{HClO}_4$  (solid line) and in the presence of ISA-D10 (dotted line) obtained using the EC-STM setup. Platinum wire was used as a reference electrode. The potential scan rate was 10 mV/s.
